# Supplementary material for: The effects of preosteoblast‐derived exosomes on macrophages and bone in mice
Source: PubMed Central journal article supplement (PMC10805488; doi:10.1111/jcmm.18029), 2023-11-06

Supplemental Figure 1

**A**

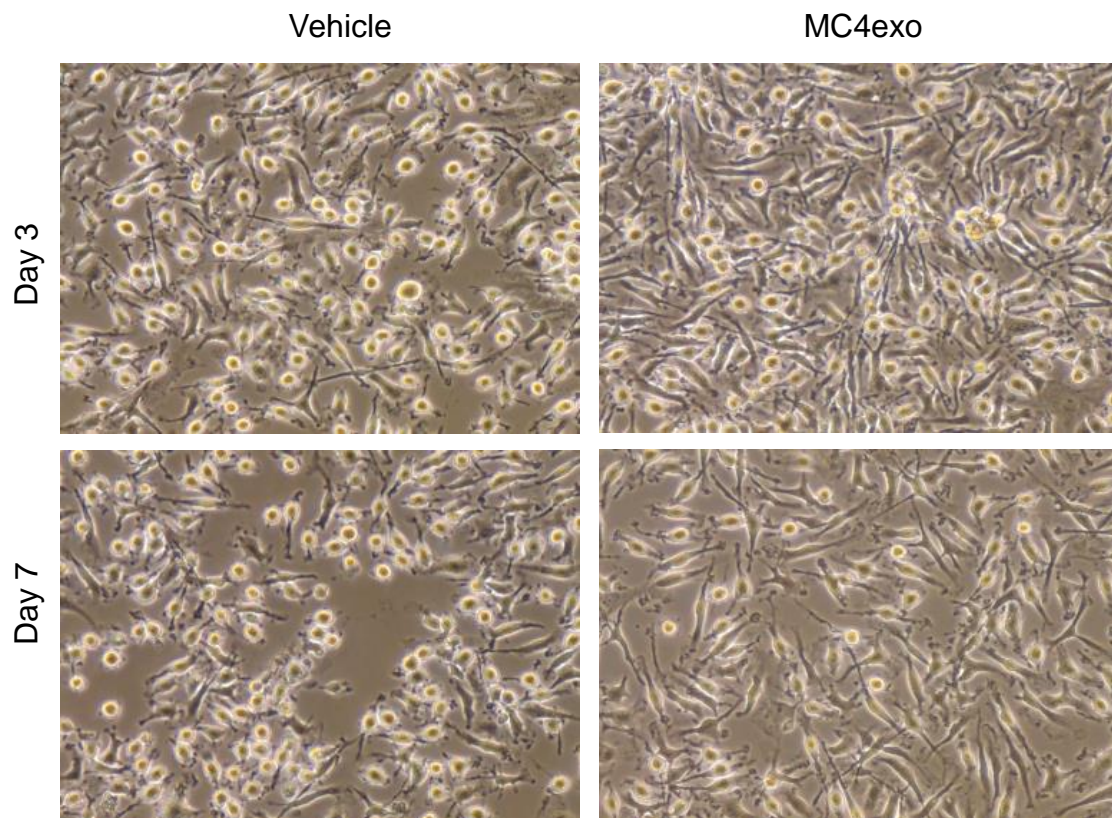

**B**

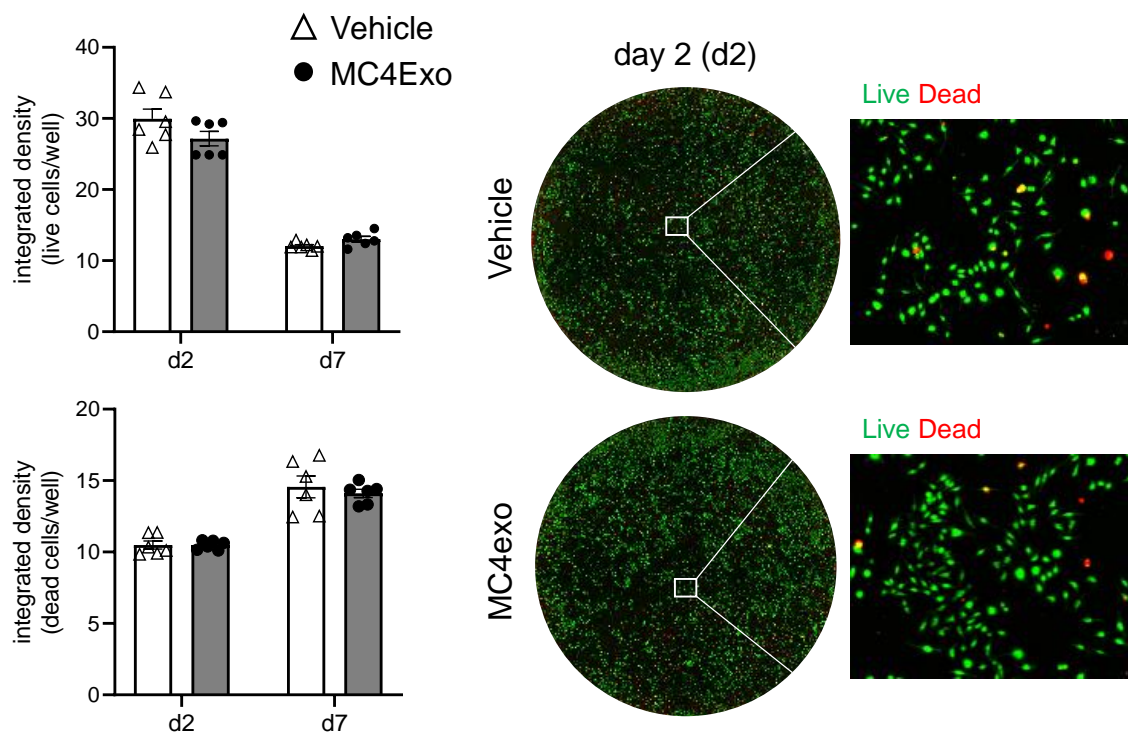

**C**

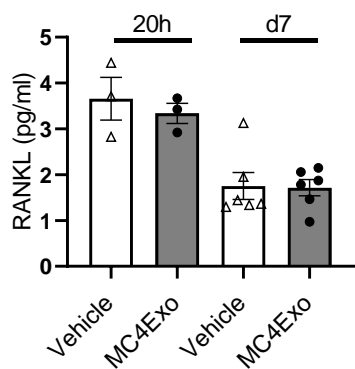

Supplemental Figure 2

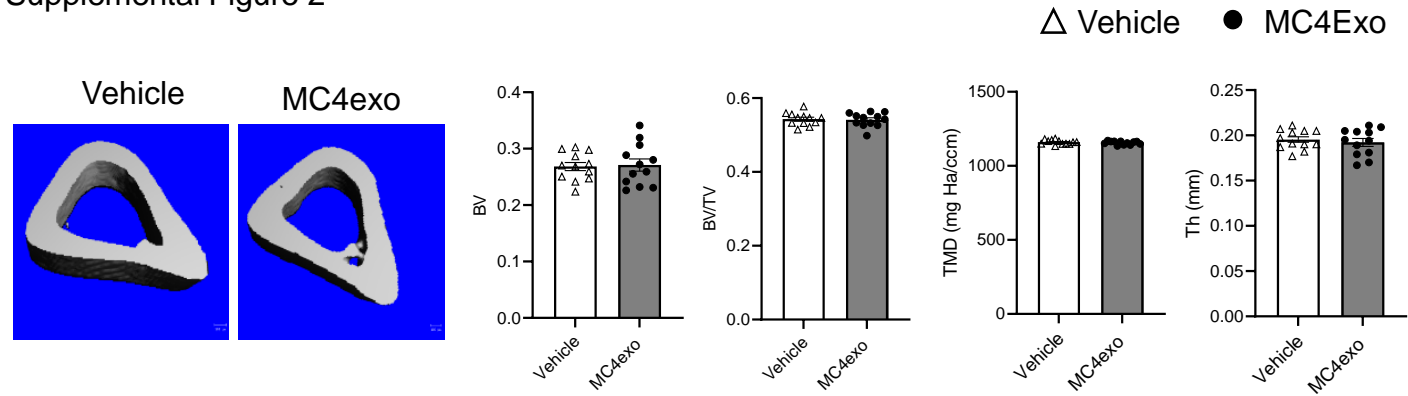

Supplemental Figure 3

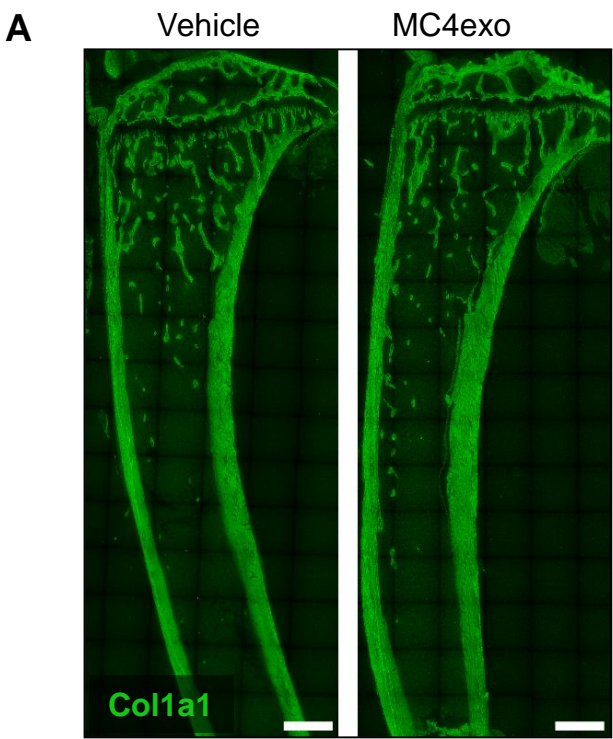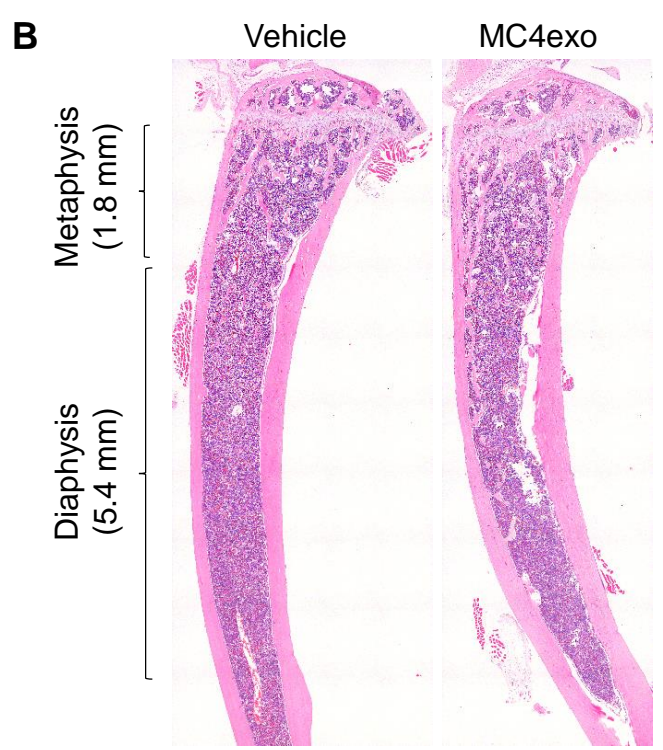

Supplement: JCMM-28-e18029-s002.pdf [file JCMM-28-e18029-s002.pdf]
